# Supplementary material for: High-performance and low-power sub-5 nm field-effect transistors based on 7-9-7-AGNR
Source: Royal Society of Chemistry journal article supplement (doi:10.1039/d3tc04035f), 2024-01-01
Supplement: d3tc04035f1.pdf [file d3tc04035f1.pdf]

## High-Performance and Low-Power Sub-5 nm Field-Effect Transistors Based on 7-9-7-AGNR

Hang Guo<sup>1</sup>, Xian Zhang<sup>2,\*</sup>, Shuai Chen<sup>3</sup>, Li Huang<sup>4,†</sup>, Yan Dong<sup>4</sup>, and Zhi-Xin Guo<sup>1,‡</sup>

<sup>1</sup>. State Key Laboratory for Mechanical Behavior of Materials, Center for Spintronics and Quantum System, School of Materials Science and Engineering, Xi'an Jiaotong University, Xi'an, Shaanxi, 710049, China.

<sup>2</sup>. Shaanxi Key Laboratory of Surface Engineering and Remanufacturing College of Mechanical and Materials Engineering Xi'an University, Xi'an 710065, China.

<sup>3</sup>. Jinan Aviation Repair Factory, No. 600, Zhangjiazhuang, Jinan, 250000, China.

<sup>4</sup> State Key Laboratory of Oral & Maxillofacial Reconstruction and Regeneration; National Clinical Research Center for Oral Diseases; Shaanxi International Joint Research Center for Oral Diseases; Department of General Dentistry and Emergency, School of Stomatology, Fourth Military Medical University, Xi'an 710032, China

\* [zhangxian1@outlook.com](mailto:zhangxian1@outlook.com)

† [huanglifmmu@qq.com](mailto:huanglifmmu@qq.com)

‡ [zxguo08@xjtu.edu.cn](mailto:zxguo08@xjtu.edu.cn)

### This PDF file includes:

**SI.** Table S1: Benchmark of the ballistic performance upper limit of the sub-5 nm n-type and p-type 7-9-7-AGNR MOSFETS against the ITRS requirements for HP devices in 2028 (2013 version).

**SII.** Table S2: Benchmark of the ballistic performance upper limit of the sub-5 nm n-type and p-type 7-9-7-AGNR MOSFETS against the ITRS requirements for LP devices in 2028 (2013 version).

**SIII.** Figure S1: The test of k-points along periodic direction for the transport simulation.

**SIV.** Figure S2: Spatially resolved LDOS for n-type 7-9-7-AGNR FET.

**SV.** Figure S3:  $I_{DS}$ - $V_g$  characteristics for the p-type 7-9-7-AGNR FETs with  $V_{bis} = 0.8$  V and  $V_{bis} = 0.6$  V.

SI. Table S1

**Table S1.** Benchmark of the ballistic performance upper limit of the sub-5 nm n-type and p-type 7-9-7-AGNR MOSFETS against the ITRS requirements for HP devices in 2028 (2013 version). The doping density is  $1 \times 10^{13} \text{ cm}^{-2}$ , unless otherwise specified.

|         | Lg(nm) | UL(nm) | SS(mV/dec) | $I_{ON}(\mu A/\mu m)$ | $I_{ON}/I_{OFF}$   | $C_g(\text{fF}/\mu m)$ | $\tau(\text{ps})$ | PDP(fJ/ $\mu m$ ) |
|---------|--------|--------|------------|-----------------------|--------------------|------------------------|-------------------|-------------------|
| n-type  | 5      | 4      | 78.954     | 1643.1                | $1.64 \times 10^4$ | 0.31525                | 0.0184            | 0.0182            |
|         |        | 3      | 72.957     | 1643.0                | $1.64 \times 10^4$ | 0.21175                | 0.0123            | 0.0122            |
|         |        | 2      | 68.255     | 1488.0                | $1.48 \times 10^4$ | 0.16235                | 0.0105            | 0.0094            |
|         |        | 1      | 65.723     | 1987.9                | $1.98 \times 10^4$ | 0.14465                | 0.0069            | 0.0083            |
|         |        | 0      | 74.204     | 1899.1                | $1.89 \times 10^4$ | 0.14330                | 0.0072            | 0.0083            |
|         | 3      | 4      | 90.638     | 1643.1                | $1.64 \times 10^4$ | 0.20090                | 0.0117            | 0.0115            |
|         |        | 3      | 90.434     | 1643.1                | $1.64 \times 10^4$ | 0.15857                | 0.0092            | 0.0091            |
|         |        | 2      | 81.631     | 2096.9                | $2.09 \times 10^4$ | 0.14465                | 0.0066            | 0.0083            |
|         |        | 1      | 76.428     | 2195.1                | $2.19 \times 10^4$ | 0.13800                | 0.0060            | 0.0079            |
|         |        | 0      | 91.209     | 2195.1                | $2.19 \times 10^4$ | 0.14475                | 0.0063            | 0.0083            |
|         | 1      | 4      | 101.753    | 2096.9                | $2.09 \times 10^4$ | 0.15780                | 0.0072            | 0.0091            |
|         |        | 3      | 95.374     | 2423.7                | $2.42 \times 10^4$ | 0.14896                | 0.0059            | 0.0086            |
|         |        | 2      | 94.027     | 2195.1                | $2.19 \times 10^4$ | 0.14759                | 0.0064            | 0.0085            |
|         |        | 1      | 95.102     | 1899.1                | $1.89 \times 10^4$ | 0.14443                | 0.0073            | 0.0083            |
|         |        | 0      | 117.098    | 1643.1                | $1.64 \times 10^4$ | 0.14556                | 0.0085            | 0.0084            |
|         | p-type | 5      | 4          | 54.656                | 269.7              | $2.69 \times 10^3$     | 0.12795           | 0.0455            |
| 3       |        |        | 54.811     | 971.5                 | $9.71 \times 10^3$ | 0.18750                | 0.0185            | 0.0108            |
| 2       |        |        | 57.776     | 940.1                 | $9.40 \times 10^3$ | 0.21745                | 0.0222            | 0.0125            |
| 1       |        |        | 58.616     | 496.9                 | $4.96 \times 10^3$ | 0.24785                | 0.0478            | 0.0143            |
| 0       |        |        | 69.199     | 496.4                 | $4.96 \times 10^3$ | 0.25210                | 0.0487            | 0.0145            |
| 3       |        | 4      | 64.734     | 734.3                 | $7.34 \times 10^3$ | 0.16730                | 0.0218            | 0.0096            |
|         |        | 3      | 68.753     | 734.3                 | $7.34 \times 10^3$ | 0.20900                | 0.0273            | 0.0120            |
|         |        | 2      | 70.229     | 734.3                 | $7.34 \times 10^3$ | 0.23600                | 0.0308            | 0.0136            |
|         |        | 1      | 74.615     | 734.3                 | $7.34 \times 10^3$ | 0.22935                | 0.0299            | 0.0132            |
|         |        | 0      | 87.257     | 734.3                 | $7.34 \times 10^3$ | 0.22720                | 0.0297            | 0.0131            |
| 1       |        | 4      | 74.994     | 423.5                 | $4.23 \times 10^3$ | 0.17115                | 0.0387            | 0.0098            |
|         |        | 3      | 79.903     | 3709.8                | $3.70 \times 10^4$ | 0.17625                | 0.0045            | 0.0102            |
|         |        | 2      | 81.681     | 4277.9                | $4.27 \times 10^4$ | 0.17645                | 0.0039            | 0.0102            |
|         |        | 1      | 86.604     | 710.0                 | $7.10 \times 10^3$ | 0.20381                | 0.0275            | 0.0117            |
|         |        | 0      | 98.339     | 539.9                 | $5.39 \times 10^3$ | 0.18352                | 0.0326            | 0.0106            |
| ITRS HP |        | 5.1    |            |                       | 900                | $9.00 \times 10^3$     | 0.60              | 0.423             |

### SII. Table S2

**Table S2.** Benchmark of the ballistic performance upper limit of the sub-5 nm n-type and p-type 7-9-7-AGNR MOSFETS against the ITRS requirements for LP devices in 2028 (2013 version). The doping density is  $1 \times 10^{13} \text{cm}^{-2}$ , unless otherwise specified.

|         | Lg(nm) | UL(nm) | SS(mV/dec) | $I_{ON}(\mu\text{A}/\mu\text{m})$ | $I_{ON}/I_{OFF}$   | $C_g(\text{fF}/\mu\text{m})$ | $\tau(\text{ps})$ | PDP(fJ/ $\mu\text{m}$ ) |
|---------|--------|--------|------------|-----------------------------------|--------------------|------------------------------|-------------------|-------------------------|
| n-type  | 5      | 4      | 78.954     | 86.0                              | $1.72 \times 10^6$ | 0.31525                      | 0.3519            | 0.0182                  |
|         |        | 3      | 72.957     | 920.5                             | $1.84 \times 10^7$ | 0.21175                      | 0.0220            | 0.0122                  |
|         |        | 2      | 68.255     | 1987.9                            | $3.94 \times 10^7$ | 0.16235                      | 0.0078            | 0.0094                  |
|         |        | 1      | 65.723     | 1987.9                            | $3.94 \times 10^7$ | 0.14465                      | 0.0069            | 0.0083                  |
|         |        | 0      | 74.204     | 1357.9                            | $2.71 \times 10^7$ | 0.14330                      | 0.0101            | 0.0083                  |
|         | 3      | 4      | 90.638     |                                   |                    | 0.20090                      |                   |                         |
|         |        | 3      | 90.434     | 27.0                              | $5.4 \times 10^5$  | 0.15857                      | 0.5640            | 0.0091                  |
|         |        | 2      | 81.631     | 226.4                             | $4.52 \times 10^6$ | 0.14465                      | 0.0610            | 0.0083                  |
|         |        | 1      | 76.428     | 114.9                             | $2.28 \times 10^6$ | 0.13800                      | 0.1150            | 0.0079                  |
|         |        | 0      | 91.209     | 5.2                               | $1.04 \times 10^5$ | 0.14475                      |                   | 0.0083                  |
|         | 1      | 4      | 101.753    |                                   |                    | 0.15780                      |                   |                         |
|         |        | 3      | 95.374     |                                   |                    | 0.14896                      |                   |                         |
|         |        | 2      | 94.027     |                                   |                    | 0.14759                      |                   |                         |
|         |        | 1      | 95.102     | 1.4                               | $2.8 \times 10^4$  | 0.14443                      |                   | 0.0083                  |
|         |        | 0      | 117.098    |                                   |                    | 0.14556                      |                   |                         |
| p-type  | 5      | 4      | 54.656     | 226.0                             | $4.52 \times 10^6$ | 0.12795                      | 0.0543            | 0.0074                  |
|         |        | 3      | 54.811     | 920.0                             | $1.84 \times 10^7$ | 0.18750                      | 0.0195            | 0.0108                  |
|         |        | 2      | 57.776     | 920.0                             | $1.84 \times 10^7$ | 0.21745                      | 0.0226            | 0.0125                  |
|         |        | 1      | 58.616     | 596.0                             | $1.19 \times 10^7$ | 0.24785                      | 0.0399            | 0.0143                  |
|         |        | 0      | 69.199     | 596.0                             | $1.19 \times 10^7$ | 0.25210                      | 0.0406            | 0.0145                  |
|         | 3      | 4      | 64.734     | 721.0                             | $1.44 \times 10^7$ | 0.16730                      | 0.0223            | 0.0096                  |
|         |        | 3      | 68.753     | 721.0                             | $1.44 \times 10^7$ | 0.20900                      | 0.0278            | 0.0120                  |
|         |        | 2      | 70.229     | 721.3                             | $1.44 \times 10^7$ | 0.23600                      | 0.0314            | 0.0136                  |
|         |        | 1      | 74.615     | 689.0                             | $1.37 \times 10^7$ | 0.22935                      | 0.0319            | 0.0132                  |
|         |        | 0      | 87.257     | 99.4                              | $1.98 \times 10^6$ | 0.22720                      | 0.2190            | 0.0131                  |
|         | 1      | 4      | 74.994     | 316.6                             | $6.32 \times 10^6$ | 0.17115                      | 0.0518            | 0.0098                  |
|         |        | 3      | 79.903     | 515.8                             | $1.03 \times 10^7$ | 0.17625                      | 0.0328            | 0.0102                  |
|         |        | 2      | 81.681     | 273.9                             | $5.46 \times 10^6$ | 0.17645                      | 0.0618            | 0.0102                  |
|         |        | 1      | 86.604     | 153.5                             | $3.06 \times 10^6$ | 0.20381                      | 0.1270            | 0.0117                  |
|         |        | 0      | 98.339     | 50.4                              | $1.08 \times 10^6$ | 0.18352                      | 0.3490            | 0.0106                  |
| ITRS LP | 5.1    |        |            | 295                               | $5.9 \times 10^6$  | 0.69                         | 1.493             | 0.28                    |

### SIII. Figure S1

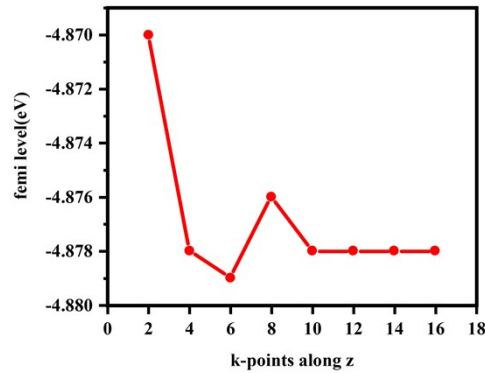

**Figure S1.** The test of k-points along periodic direction for the transport simulation. The simulation accuracy can be satisfactory when the number of k-point is larger than 10 along the periodic direction.

### SIV. Figure S2

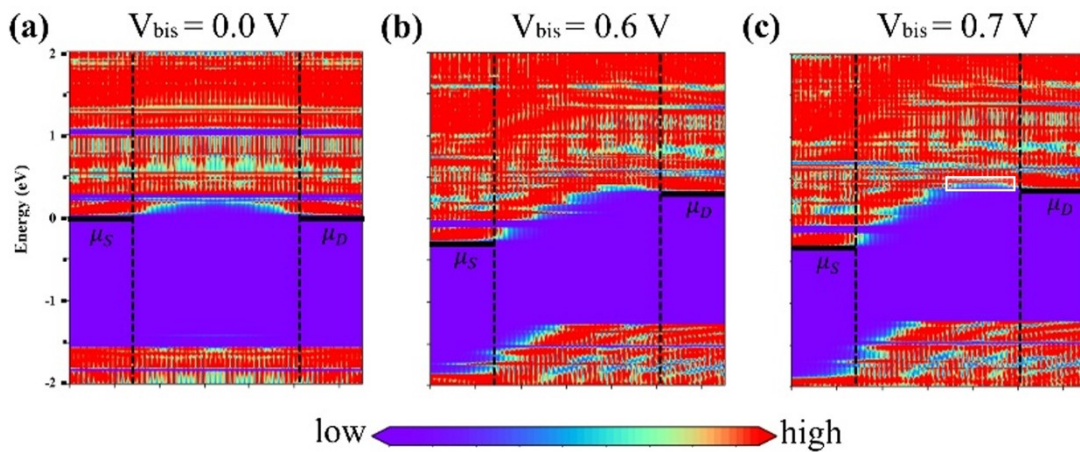

**Figure S2.** Spatially resolved LDOS for n-type 7-9-7-AGNR FET. (a), (b), (c) represent the LDOS of doping concentration of  $1 \times 10^{13}$  with  $V_{\text{bis}} = 0.0, 0.6,$  and  $0.7 \text{ V}$ , respectively.  $\mu_S$  and  $\mu_D$  are the electrochemical potentials of the source and drain, respectively. The white rectangle in (c) indicates the sizable energy barrier appears between the right lead and the channel region.

SV. Figure S3

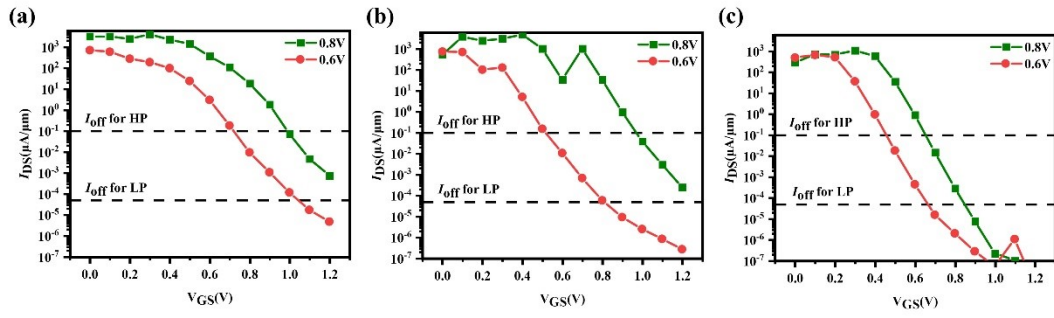

Figure R3.  $I_{DS}$ - $V_g$  characteristics for the p-type 7-9-7-AGNR FETs with  $V_{bis} = 0.8$  V (green line),  $V_{bis} = 0.6$  V (red line). (a-c) are the p-type FETs with different gate lengths (1nm, 3nm, 5nm). Note that the overlapping ( $L_{UL}$ ) is set to be zero.
